# Supplementary material for: Biobank Quality Management in the BBMRI.be Network
Source: Front Med (Lausanne). 2019 Jun 26;6:141. doi: 10.3389/fmed.2019.00141 (PMC6606712; doi:10.3389/fmed.2019.00141)
Supplement: Supplementary file 1 [file Table_1.XLSX]

## Sheet: Survey 1 - 2017
Survey 1 - created in SurveyMonkey, distributed to biobank quality managers in 2017
Question	Response	Mandatory
Have you already implemented a Quality Management System (according to biobank guidelines) in your biobank?	Yes |No	Y
Which guidelines did you use to implement your QMS?	Not applicable | ISO 9001 | ISO 15189 | ISO 17025 | OECD HBGRD | OECD BRC | NF S 96-900 | WHO-IARC | ISBER Best Practices | NCI Best Practices | CMI Guidelines | BWB Quality Book | Other	Y	multiple answers allowed
Have you implemented one of the following?	SPREC - automated | SPREC - manual | BRISQ Recommendations | None, SPREC in future | None, BRISQ in future	Y
Did you ever take a self-assessment-survey to assess the current status of your biobank quality?	ISBER SAS | BBMRI SAS QMS | BBMRI SAS tech spec | No | Other	Y	multiple answers allowed
Did you participate in any of the Biobanking Proficiency Testing Schemes organized by IBBL?	Yes | No	Y
Do you intend to acquire one of following certifications/accreditations?	ISO 9001 | NF S96-900 | ISO 20387 (when available) | Not applicable | Other	Y	multiple answers allowed
What would help you with your biobank (quality) activities?	More information regarding biobank quality develpments | The possibility to ask questions concerning specific (quality) issues | The possibility to get a peer review/gap analysis of your biobank | other	Y	multiple answers allowed

## Sheet: Survey 2 - 2018
Survey 2 - created in REDCAP, distributed to biobank quality managers in 2018
Variable / Field Name	Form Name	Section Header	Field Type	Field Label	Choices, Calculations, OR Slider Labels	Field Note	Text Validation Type OR Show Slider Number	Text Validation Min	Text Validation Max	Identifier?	Branching Logic (Show field only if...)	Required Field?	Custom Alignment	Question Number (surveys only)	Matrix Group Name	Matrix Ranking?	Field Annotation
record_id	bbmri_survey_qms		text	Record ID
bb_name	bbmri_survey_qms		text	Biobank name								y
contact_persoon	bbmri_survey_qms		text	Contact person								y
address_full	bbmri_survey_qms		text	Address		Full address of the biobank						y
email_contact	bbmri_survey_qms		text	Email			email					y
type_institutuion	bbmri_survey_qms	General Biobank Information	radio	Type of institution	1, Academic center (University) | 2, University Hospital | 3, Hospital | 4, Research institution (NV/VZW) | 5, Commercial center							y
type_biobank	bbmri_survey_qms		checkbox	Type of biobank	1, Disease-oriented biobank | 2, Population biobank | 3, Environmental biobank	multiple answers possible						y
type_collection	bbmri_survey_qms		checkbox	Type of collection	1, Systematic (general ongoing collection) | 2, Project/study based							y
type_use	bbmri_survey_qms		checkbox	What is the type of use of the human body material (HBM) collected?	1, Primary use (narrow informed consent) | 2, Secondary use | 3, Residuary material (opt-out principle)							y
certif_labo	bbmri_survey_qms		yesno	Is your biobank part of a certified or accreditated lab-environment?								y
certif_bepaling	bbmri_survey_qms		text	Please define the certification/accreditation standard and the lab of which it is part		(e.g. ISO 15189, pathology lab)					[certif_labo]='1'
cert_biobank	bbmri_survey_qms		radio	Have you obtained a certification, specific for your biobank activities?	1, No | 2, Yes, the ISO 9001 certification | 3, Yes, the CAP Biorepository accreditation | 4, Yes, the CTRNet Biobank certification | 5, Yes, other							y
certif_bio_other	bbmri_survey_qms		text	Please specify other:							[cert_biobank]=5	y
recievesamples_accred	bbmri_survey_qms		yesno	Does your biobank recieve samples from a certified or accreditated environment?								y
certif_collab	bbmri_survey_qms		checkbox	Please indicate from which certified/accreditated environments samples are recieved	1, Pathology department (ISO 15189) | 2, Clinical lab (ISO 17025) | 3, Medical Genetics department (ISO 15189) | 4, Other						[recievesamples_accred]='1'	y
other_certif_spec	bbmri_survey_qms		text	Please specify other:		(e.g. ....lab, ISO....)					[certif_collab(4)] = '1'	y
qms	bbmri_survey_qms		radio	Does your biobank have a quality management system?	1, Yes | 2, No | 3, We are implementing a quality management system							y
qms_norm_basis	bbmri_survey_qms		radio	Which quality norm is the primary basis of your quality management system?	1, ISO 9001 | 2, ISO 15189 | 3, ISO 17025 | 4, ISO 20387 | 5, CMI Quality Handbook (Flemish Biobank Initiative) | 6, BWB Quality Handbook (Wallonia Brussels Biobank) | 7, ISBER best practices | 8, OECD guidelines for biorepositories | 9, French biobank norm NF S96-900 | 10, Other						[qms]='1' or [qms]='3'	y
other_spec_qms	bbmri_survey_qms		text	Please specify other:							[qms_norm_basis]='10'	y
qms_norm_add	bbmri_survey_qms		checkbox	Which additional norms are taken into account within your QMS?	1, ISO 9001 | 2, ISO 15189 | 3, ISO 17025 | 4, ISO 20387 | 5, CMI Quality Handbook (Flemish Biobank Initiative) | 6, BWB Quality Handbook (Wallonia Brussels Biobank) | 7, ISBER best practices | 8, OECD guidelines for biorepositories | 9, French biobank norm NF S96-900 | 10, None | 11, Other						[qms]='1' or [qms]='3'	y
other_spec	bbmri_survey_qms		text	Please specify other:							[qms_norm_add(11)] = '1'
doc_mgmt_system	bbmri_survey_qms		yesno	Does your biobank use a document management system?								y
doc_mgmt_type	bbmri_survey_qms		radio	Is this document management system:	1, Electronic | 2, Paper based						[doc_mgmt_system]=1	y
doc_mgmt_firm	bbmri_survey_qms		radio	Which system is used for document management?	1, Sharepoint | 2, Iprova - Idocument | 3, Bitos - Mithras | 4, Confluence | 5, Other						[doc_mgmt_type]='1'	y
doc_mgmt_firm_other	bbmri_survey_qms		text	Please specify other:							[doc_mgmt_firm]=5	y
hor0	bbmri_survey_qms	In this section, we go deeper into the Quality Management system by looking at specific procedures. Through these questions, we evaluate the current status of the QMS system, implemented in your biobank. The items listed are collected and aggregated from the ISBER best practices for biorepositories, the ISO 20387 and ISO 9001 standards.
hor0	bbmri_survey_qms	Does your biobank have the following general procedures?"	radio	Biobank mission and policy statement	1, Yes | 2, In preparation | 3, No										qmsonderdelen
hor1	bbmri_survey_qms		radio	Quality handbook	1, Yes | 2, In preparation | 3, No										qmsonderdelen
hor2	bbmri_survey_qms		radio	Governance structure	1, Yes | 2, In preparation | 3, No										qmsonderdelen
hor3	bbmri_survey_qms		radio	Organisational chart	1, Yes | 2, In preparation | 3, No										qmsonderdelen
hor4	bbmri_survey_qms		radio	Floor plans	1, Yes | 2, In preparation | 3, No										qmsonderdelen
hor5	bbmri_survey_qms		radio	Confidentiality procedures and statements	1, Yes | 2, In preparation | 3, No										qmsonderdelen
hor6	bbmri_survey_qms		radio	Impartiality statement	1, Yes | 2, In preparation | 3, No										qmsonderdelen
hor7	bbmri_survey_qms		radio	Personnel recruitment procedure	1, Yes | 2, In preparation | 3, No										qmsonderdelen
hor8	bbmri_survey_qms		radio	Personnel training and competence evaluation	1, Yes | 2, In preparation | 3, No										qmsonderdelen
hor9	bbmri_survey_qms		radio	Health and safety procedures	1, Yes | 2, In preparation | 3, No										qmsonderdelen
hor10	bbmri_survey_qms		radio	Facility management	1, Yes | 2, In preparation | 3, No										qmsonderdelen
hor11	bbmri_survey_qms		radio	Facility monitoring and environmental control	1, Yes | 2, In preparation | 3, No										qmsonderdelen
hor12	bbmri_survey_qms		radio	Contingency plan	1, Yes | 2, In preparation | 3, No										qmsonderdelen
hor13	bbmri_survey_qms		radio	Equipment management (controlled implementation, validation, maintenance...)	1, Yes | 2, In preparation | 3, No										qmsonderdelen
hor14	bbmri_survey_qms		radio	Equipment register	1, Yes | 2, In preparation | 3, No										qmsonderdelen
hor15	bbmri_survey_qms		radio	Customer satisfaction and complaint handling	1, Yes | 2, In preparation | 3, No										qmsonderdelen
hor16	bbmri_survey_qms		radio	Management review	1, Yes | 2, In preparation | 3, No										qmsonderdelen
hora	bbmri_survey_qms	Does your biobank have the following specific biobank procedures?	radio	Collection of HBM	1, Yes | 2, In preparation | 3, No | 4, Not applicable for our activities										matricbbspecproc
horb	bbmri_survey_qms		radio	Transport of HBM to the biobank	1, Yes | 2, In preparation | 3, No | 4, Not applicable for our activities										matricbbspecproc
horc	bbmri_survey_qms		radio	Reception of HBM	1, Yes | 2, In preparation | 3, No | 4, Not applicable for our activities										matricbbspecproc
hord	bbmri_survey_qms		radio	Processing of HBM	1, Yes | 2, In preparation | 3, No | 4, Not applicable for our activities										matricbbspecproc
hore	bbmri_survey_qms		radio	Cryopreservation of HBM	1, Yes | 2, In preparation | 3, No | 4, Not applicable for our activities										matricbbspecproc
horf	bbmri_survey_qms		radio	Storage of HBM	1, Yes | 2, In preparation | 3, No | 4, Not applicable for our activities										matricbbspecproc
horg	bbmri_survey_qms		radio	Sample lookup in the biobank	1, Yes | 2, In preparation | 3, No | 4, Not applicable for our activities										matricbbspecproc
horh	bbmri_survey_qms		radio	Requesting samples	1, Yes | 2, In preparation | 3, No | 4, Not applicable for our activities										matricbbspecproc
hori	bbmri_survey_qms		radio	Distribution/export of HBM out of the biobank	1, Yes | 2, In preparation | 3, No | 4, Not applicable for our activities										matricbbspecproc
horj	bbmri_survey_qms		radio	Disposal of HBM	1, Yes | 2, In preparation | 3, No | 4, Not applicable for our activities										matricbbspecproc
hork	bbmri_survey_qms		radio	Contracts for collaborations	1, Yes | 2, In preparation | 3, No | 4, Not applicable for our activities										matricbbspecproc
horl	bbmri_survey_qms		radio	Material transfer agreement templates	1, Yes | 2, In preparation | 3, No | 4, Not applicable for our activities										matricbbspecproc
horm	bbmri_survey_qms		radio	Quality control of HBM	1, Yes | 2, In preparation | 3, No | 4, Not applicable for our activities										matricbbspecproc
horn	bbmri_survey_qms		radio	Quality control of methods/processes (validation/verification)	1, Yes | 2, In preparation | 3, No | 4, Not applicable for our activities										matricbbspecproc
horo	bbmri_survey_qms		radio	Quality control of data	1, Yes | 2, In preparation | 3, No | 4, Not applicable for our activities										matricbbspecproc
horp	bbmri_survey_qms		radio	Quality deviations: CAPA of non-conformities	1, Yes | 2, In preparation | 3, No | 4, Not applicable for our activities										matricbbspecproc
h1	bbmri_survey_qms	Does your biobank have the following system with related procedures regarding record and datamanagement	radio	Sample data management system	1, Yes, electronic | 2, Yes, paper based | 3, Electronic system in preparation | 4, Paper based system in preparation | 5, No										systems
h2	bbmri_survey_qms		radio	Quality improvement system (CAPA follow-up)	1, Yes, electronic | 2, Yes, paper based | 3, Electronic system in preparation | 4, Paper based system in preparation | 5, No										systems
h3	bbmri_survey_qms		radio	Audit follow-up system	1, Yes, electronic | 2, Yes, paper based | 3, Electronic system in preparation | 4, Paper based system in preparation | 5, No										systems
h4	bbmri_survey_qms		radio	Risk management system	1, Yes, electronic | 2, Yes, paper based | 3, Electronic system in preparation | 4, Paper based system in preparation | 5, No										systems
h5	bbmri_survey_qms		radio	Provider and customer management system	1, Yes, electronic | 2, Yes, paper based | 3, Electronic system in preparation | 4, Paper based system in preparation | 5, No										systems
certif	bbmri_survey_qms	Biobank future perspectives and needs	yesno	Does your biobank strive for an official certification or accreditation, within two year?								y
certif_options	bbmri_survey_qms		checkbox	Which certification/accreditation are you aiming for?	1, ISO 9001 | 2, ISO 20387 | 3, ISO 15189 | 4, ISO 17025 | 5, Other						[certif]=1	y
certif_other	bbmri_survey_qms		text	Please specify other:							[certif_options(5)]='1'	y
selfass_alg	bbmri_survey_qms		yesno	Are you using any self-assessment tools to assess your QMS system?								y
selfass_tools	bbmri_survey_qms		checkbox	Which self-assessment tools are being used in your biobank?	1, Quality management systems - general requirements for biobanking (BBMRI-ERIC) | 2, Specifications for Pre-examination processes for snap frozen tissue (CEN/TS 16826-1/2) | 3, Specifications for Pre-examination processes for FFPE tissue (CEN/TS 16827-1/2/3) | 4, Specifications for Pre-examination processes for Venous whole blood (CEN/TS 16835-1/2/3) | 5, Specifications for Pre-examination proce…						[selfass_alg]=1	y
selfass_belg	bbmri_survey_qms		yesno	Do you think it is necessary to have a self-assessment tool for biobanks, specific in Belgium (adapted to the Belgian legislation)?								y
selfass_belg_part	bbmri_survey_qms		yesno	Would you participate in the Belgian self-assessment tool?							[selfass_belg]='1'	y
prof_testing	bbmri_survey_qms		radio	Does your biobank participate at least yearly in external proficiency testing programs?	1, No | 2, Yes, through the accredited lab of which we are a part | 3, Yes, in a biobank specific program (e.g. IBBL) | 4, Yes, through both (accredited lab and biobank specific program)							y
prof_testing_why	bbmri_survey_qms		checkbox	What is the reason not to participate in external proficiency testing?	1, The tests are very expensive, not enough budget | 2, This is with an organisation abroad, and not in Belgium | 3, We don't see this as an additional value for our biobank | 4, It is not requested by our biobank providers/customers | 5, Other						[prof_testing]='1'	y
prof_testing_other	bbmri_survey_qms		text	Please specify other:							[prof_testing_why(5)]='1'	y
prof_testing_nat	bbmri_survey_qms		yesno	Do you think it is necessary to set up a national proficiency testing program for the Belgian biobanks?								y
prof_testing_nat_part	bbmri_survey_qms		yesno	Would you participate in a national proficiency testing program?							[prof_testing_nat]='1'	y
audit_gen	bbmri_survey_qms		yesno	Do you think it is necessary to setup a "peer review" audit program for Belgian biobanks?								y
audit_part	bbmri_survey_qms		yesno	Would your biobank participate in the audit program?							[audit_gen]='1'	y
audit_type	bbmri_survey_qms		radio	What type of audit would you prefer?	1, Administrative audit of procedures (off-site) | 2, Two phase audit: Initial administrative audit of procedures (off-site) followed by a site visit (1 year later) | 3, Full on-site audit						[audit_gen]='1'	y
add_remarks	bbmri_survey_qms		text	Do you have additional remarks/suggestions/needs that you would like to mention to the Quality Working Group?
